# Supplementary material
Source: PubMed Central journal article supplement (PMC8447022)
Supplement: RESP-26-812-s001.pdf [file RESP-26-812-s001.pdf]

# Inhaled corticosteroid is *not* associated with a poor prognosis in COVID-19

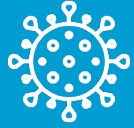

Study population : 6,520 confirmed COVID-19 patients in South Korea

Non-ICS user (n=6,335)

ICS user (n=185)

After adjusted

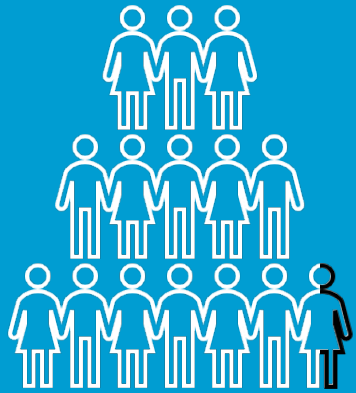

Mortality (3.1%)

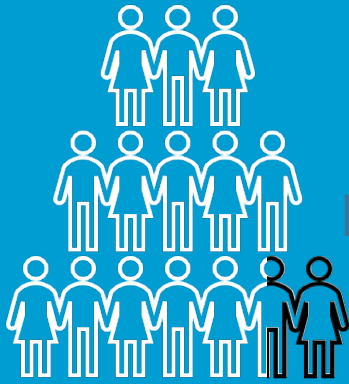

Mortality (9.7%)

Age

Sex

Comorbidities

Socioeconomic status

ICS ( $\pm$ LABA)

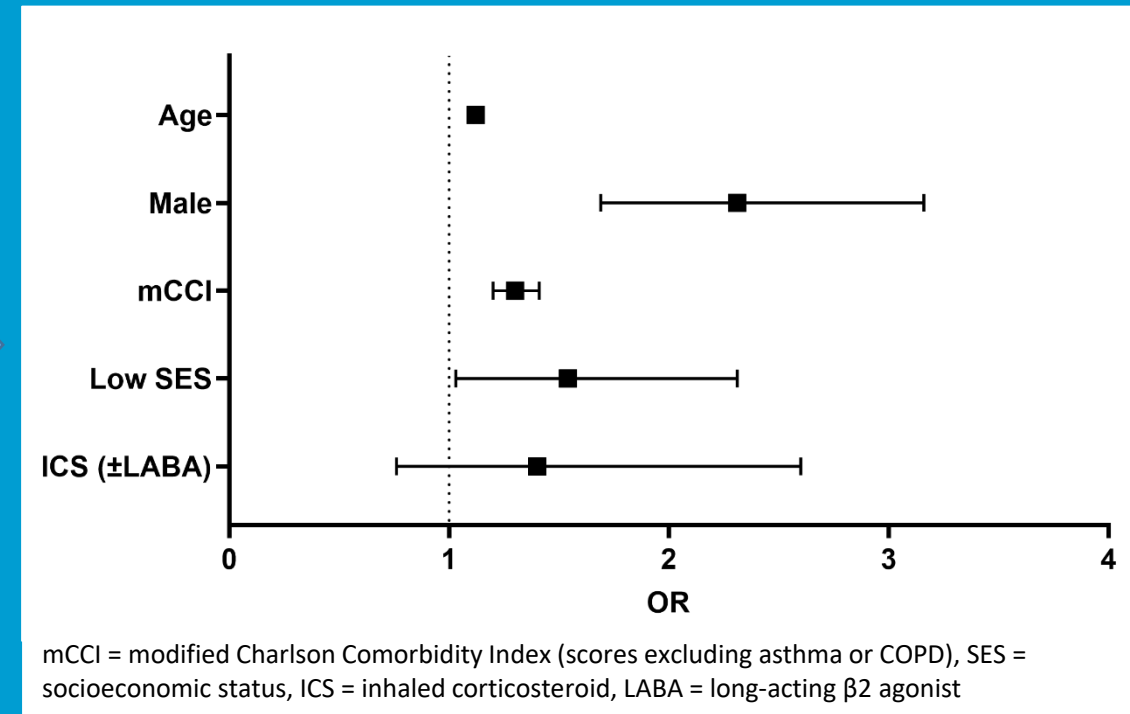

- ICS group showed higher mortality than non-ICS group in COVID-19.
- The use of ICS ( $\pm$ LABA) was not associated with mortality after adjusted confounding factors (OR = 1.40, 95% CI (0.76-2.60),  $p = 0.28$ )
